# Supplementary material
Source: PubMed Central journal article supplement (PMC3640990)
Supplement: NIHMS455172-supplement-pca_plot.pdf [file NIHMS455172-supplement-pca_plot.pdf]

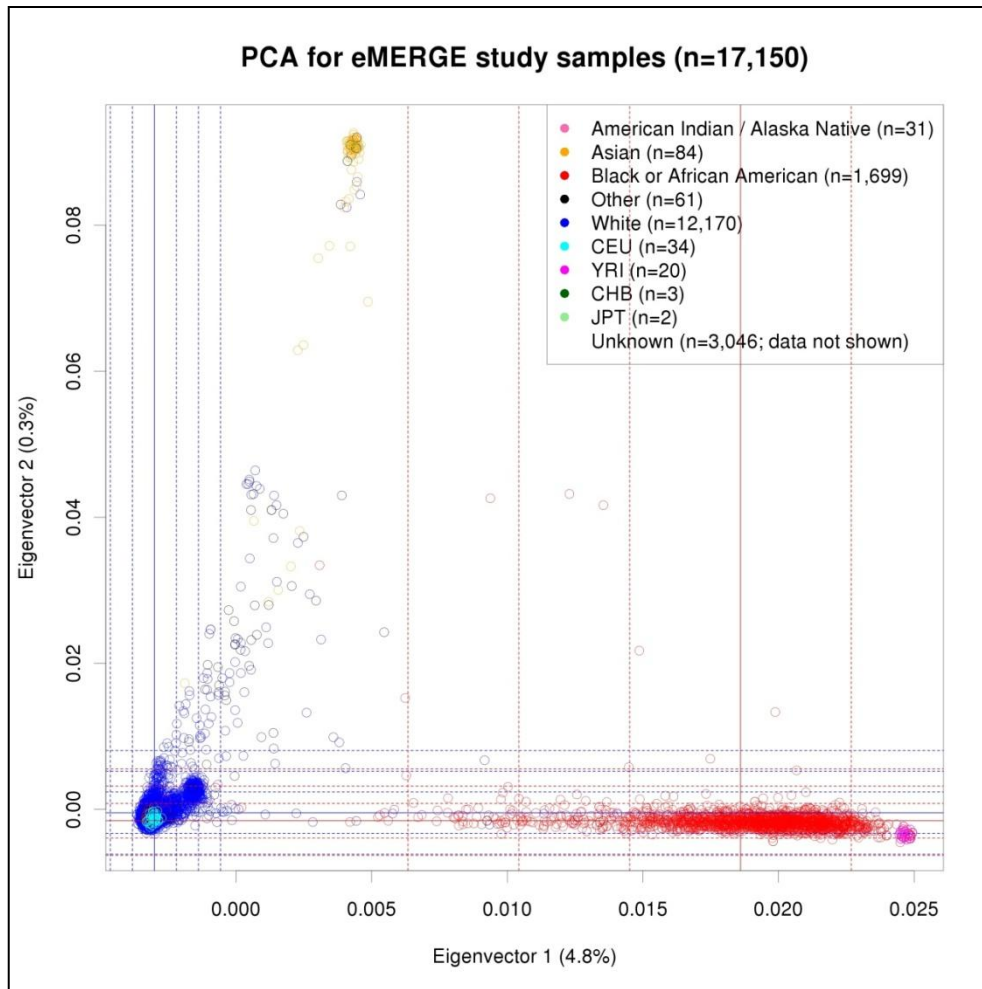

**Supplemental** Figure S1: Plots of eigenvectors 1 and 2 using PCA. Principal components analysis of 17,150 eMERGE subjects from all field centers, anchored by HapMap controls. Color-coding is according to self-identified or self-observed race.

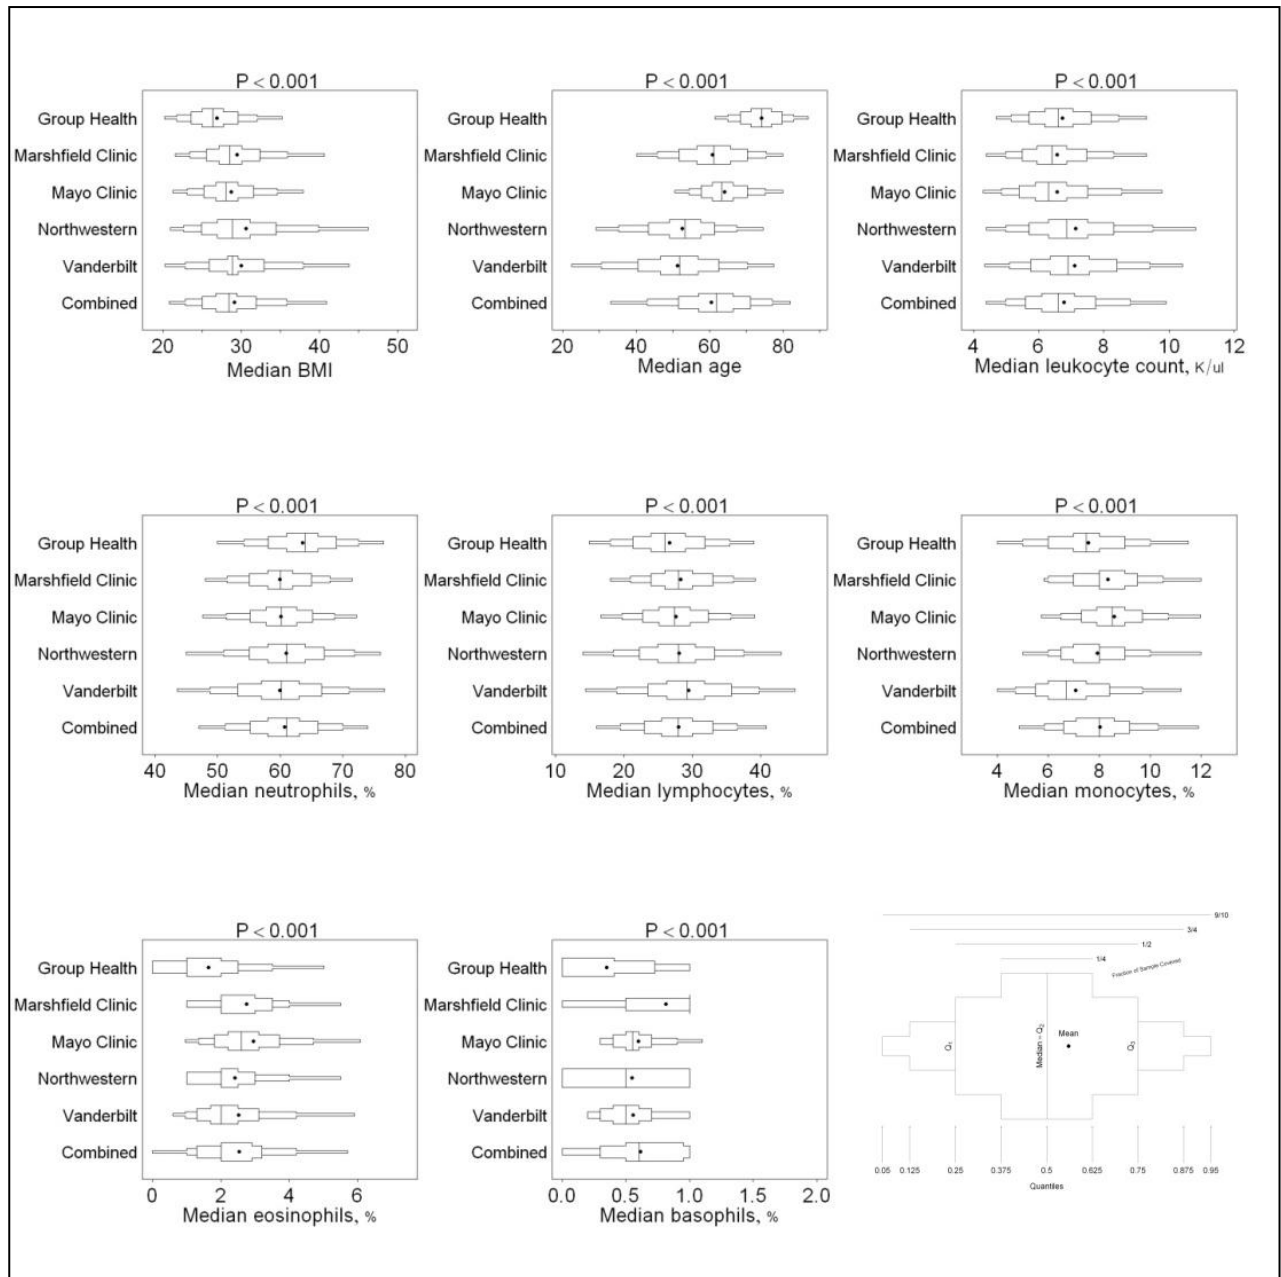

**Supplemental** Figure S2: Box-percentile plots of median age, median BMI, median leukocyte count and median differentials. The bottom right plot is an annotated example showing the layout of the box-percentile plots. P-values listed are from the Kruskal-Wallis test as listed in Table 2.

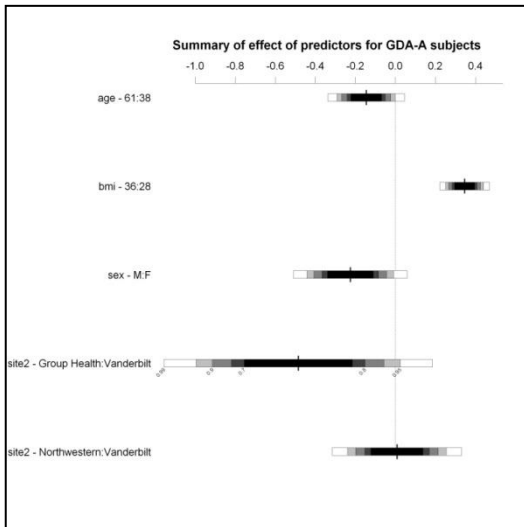

**a.**

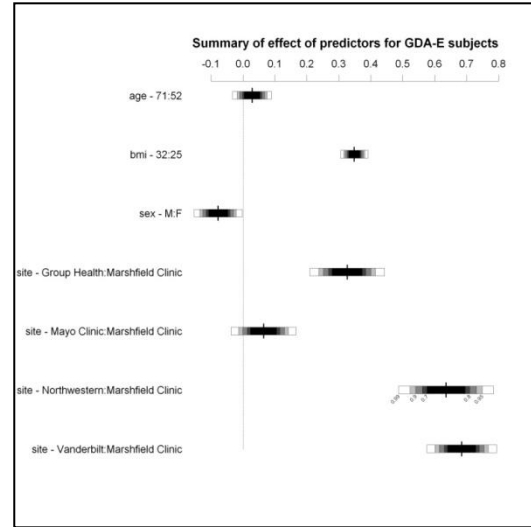

**b.**

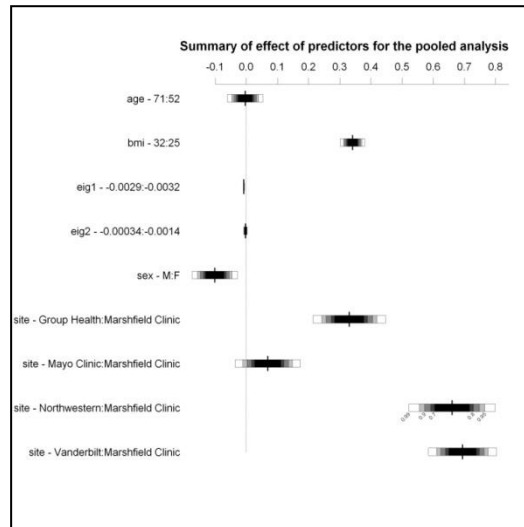

**c.**

**Supplemental** Figure S3: Summary of effects of predictors on WBC in the (a.) AA, (b.) EE and (c.) pooled models. Continuous variables are compared using default ranges (interquartile).

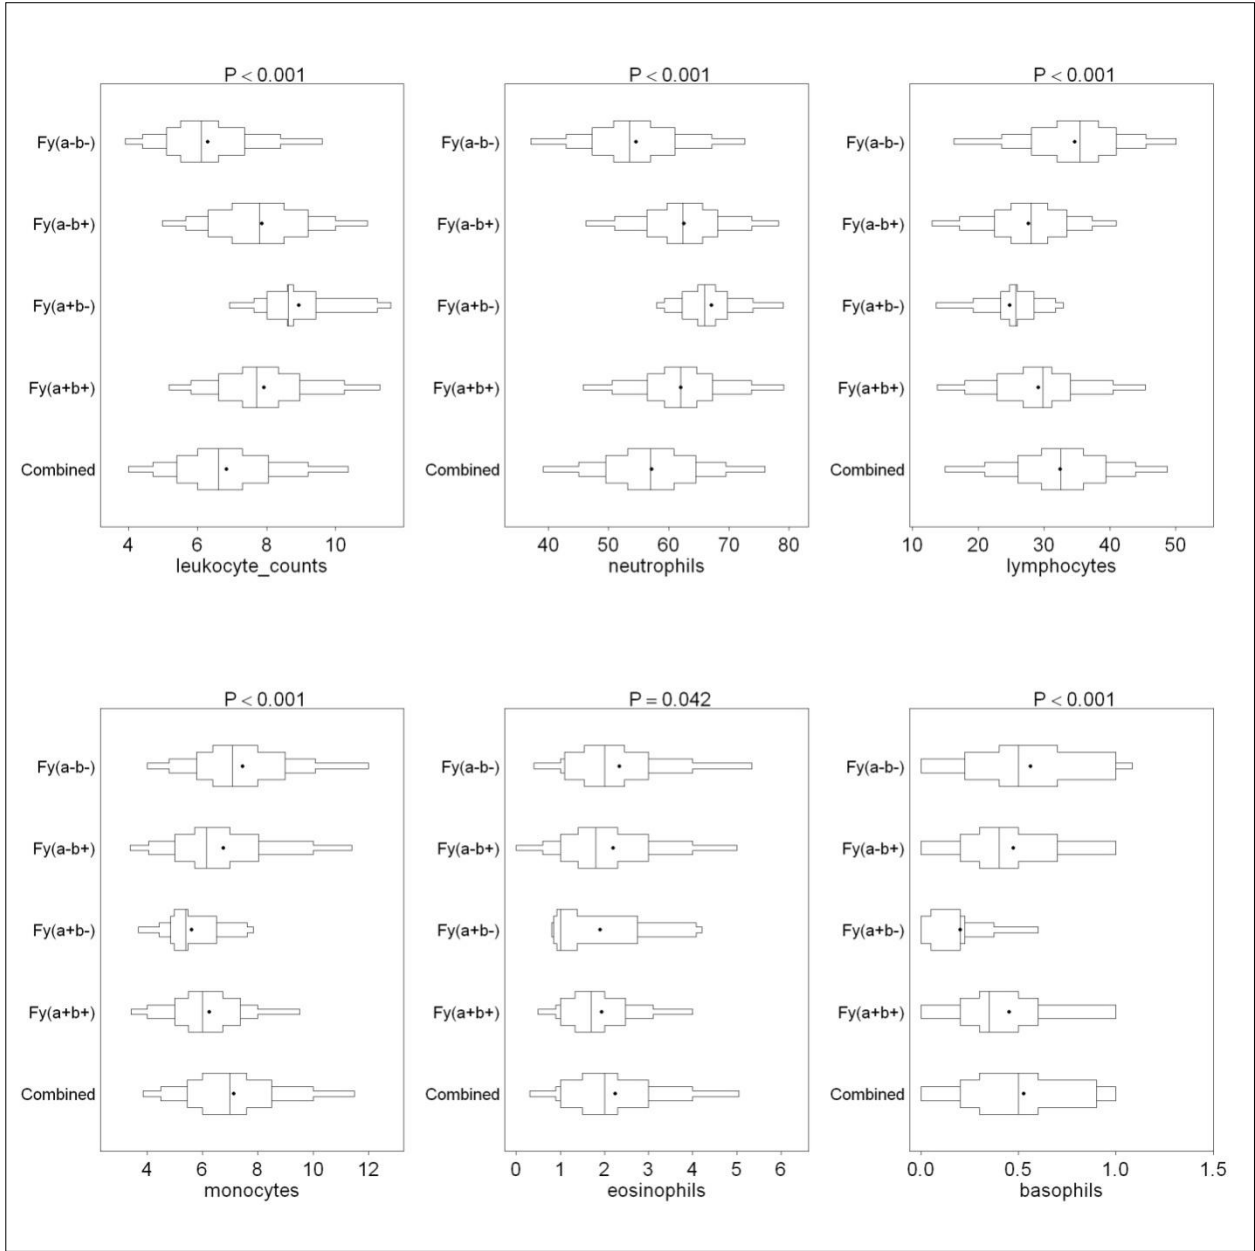

**Supplemental** Figure S4: Box-percentile plots of median leukocyte count and median differentials by Duffy phenotype (Fya+b+, Fya+b-, Fya-b+, Fya-b-) in the subjects of African ancestry. The bottom right plot in Figure 1 is an annotated example showing the layout of the box-percentile plots. P-values listed are from the Kruskal-Wallis test.

Supplemental Table 1: Summary of effects of loci that reached genome-wide significance for the pooled analyses by study site.

|                       | Group Health |         | Marshfield |         | Mayo    |          | Northwestern |         | Vanderbilt |          |          |
|-----------------------|--------------|---------|------------|---------|---------|----------|--------------|---------|------------|----------|----------|
|                       | $\beta$      | p-value | $\beta$    | p-value | $\beta$ | p-value  | $\beta$      | p-value | $\beta$    | p-value  |          |
| <b>1q21, DARC</b>     |              |         |            |         |         |          |              |         |            |          |          |
|                       | 0.0          | 6.30E-  | -          | 8.37E-  | -       |          |              | 2.27E-  |            |          |          |
| rs12075               | 2            | 01      | 0.06       | 02      | 0.0     | 7        | 9.42E-02     | 0.10    | 01         | 0.10     | 5.69E-02 |
| <b>17q21.1, GSDMA</b> |              |         |            |         |         |          |              |         |            |          |          |
|                       | 0.0          | 3.50E-  |            | 5.06E-  | 0.1     |          |              | 1.27E-  |            |          |          |
| rs3894194             | 4            | 01      | 0.09       | 03      | 1       | 1.06E-02 | 0.19         | 02      | 0.12       | 7.70E-03 |          |
|                       | 0.0          | 2.48E-  |            | 3.36E-  | 0.2     |          |              | 1.68E-  |            |          |          |
| rs3859192             | 9            | 02      | 0.10       | 03      | 0       | 3.37E-06 | 0.18         | 02      | 0.13       | 4.06E-03 |          |
| <b>17q21.1, PSMD3</b> |              |         |            |         |         |          |              |         |            |          |          |
|                       | 0.1          | 5.27E-  |            | 1.64E-  | 0.1     |          |              | 1.81E-  |            |          |          |
| rs4065321             | 4            | 04      | 0.10       | 03      | 5       | 7.60E-04 | 0.19         | 02      | 0.15       | 3.95E-04 |          |
| <b>17q21.1, MED24</b> |              |         |            |         |         |          |              |         |            |          |          |
|                       | -            |         |            |         | -       |          |              |         |            |          |          |
|                       | 0.1          | 9.49E-  | -          | 8.41E-  | 0.1     |          |              | 1.29E-  |            |          |          |
| rs9916158             | 1            | 03      | 0.13       | 05      | 8       | 4.58E-05 | -0.13        | 01      | -0.09      | 6.79E-02 |          |
